# Supplementary material
Source: PubMed Central journal article supplement (PMC3088572)
Supplement: 1018360108_pnas.201018360SI.pdf [file 1018360108_pnas.201018360SI.pdf]

# Supporting Information

Sampah et al. 10.1073/pnas.1018360108

## SI Methods

**Generation of Drug-Resistant Mutants.** A previously described HIV-1 NL4-3 proviral construct encoding GFP within a truncated *env* ORF (1) was a starting vector for the construction of mutant proviruses. In this construct, there is a KDEL sequence after the GFP coding sequence. This results in retention of GFP in the endoplasmic reticulum, giving high-level expression in infected cells. Fragments of this vector containing the relevant HIV-1 genes were cloned into pCR 4Blunt-TOPO vector. Site-directed mutagenesis was performed on the resulting vectors by PCR (QuikChange; Stratagene), according to the manufacturer's instructions, using primers coding for known single resistance mutations (2–4). The mutant fragment was then cloned into the complete NL4-3 vector to produce drug-resistant, GFP-tagged, envelope-defective HIV-1 vectors. The presence of the desired mutations in all recombinant HIV vectors was verified by DNA sequencing.

**Clinical Isolates.** Patient-derived *gag-pol* sequences were amplified by RT-PCR from plasma virus, as described previously (1), or by PCR from genomic DNA isolated from CD4<sup>+</sup> T cells that were infected with concentrated plasma from viremic patients. DNA sequencing confirmed that isolates only contained the M184V or K103N mutation. Recombinant HIV-1 vectors containing patient-derived *gag-pol* sequences were made by replacing a 1.5-kb *gag-pol* fragment of NL4-3 with corresponding patient-derived sequences.

**Antiretroviral Drugs.** We obtained RAL from Chemietek, EFV from Roche and elvitegravir from Gilead/Merck. All other anti-HIV-1 drugs were obtained through the AIDS Research and Reference Reagent Program, Division of AIDS, National Institute of Allergy and Infectious Diseases, US National Institutes of Health. All drugs were dissolved in DMSO at 60 mM, aliquoted, and stored at –20 °C, with the exception of tenofovir, TDF, emtricitabine, stavudine, EFV, and IDV, which were dissolved in double-distilled water. Drugs were serially diluted in their corresponding solvents to maintain the final solvent concentration in cell culture constant at 0.5% (vol/vol). Similar results were obtained for experiments using tenofovir and TDF.

**Virus Production.** HEK293T cells were cotransfected with the mutant NL4-3 vectors and an HIV-1 CXCR4 envelope expression vector using Lipofectamine 2000 (Invitrogen) according to the manufacturer's instructions. For experiments involving PIs, the medium was replaced with RPMI1640 (Invitrogen) supplemented with 50% (vol/vol) human serum (Gemini), 10% (vol/vol) FBS (Gemini), and serially diluted drugs 6–7 h after transfection. Virus-containing supernatants were collected after 48 h after transfection, spun at 335 × *g* for 10 min, and then filtered through a 0.22-mm membrane to remove cell debris. These virus preparations were then used for infection or stored at –80 °C. The amount of mutant virus used for each experiment was standardized relative to WT virus by measuring transfection efficiency of

NL4-3 vector in the HEK293T cells using GFP expression as quantified by flow cytometry.

For all other drugs, transfected cells were cultured in RPMI1640 supplemented with 10% (vol/vol) FBS only. At 48 h after transfection, cell debris was cleared as described above and virus was harvested by ultracentrifugation at 100,000 × *g* at 4 °C for 2 h, aliquoted, and stored at –80 °C. The amount of mutant virus used for each experiment was standardized relative to WT virus by p24 concentration measured using an ELISA (Perkin–Elmer).

**Single-Round Infectivity Assay.** A single-round infectivity assay (1, 5, 6) was used to evaluate antiretroviral drug activity against drug-resistant variants. Peripheral blood mononuclear cells were obtained from healthy blood donors by Hypaque-Ficoll gradient centrifugation. All healthy blood donors gave their informed consent, and the Institutional Review Board of The Johns Hopkins University approved this study. The cells were activated with phytohemagglutinin (0.5 mg/mL) and IL-2 (100 U/mL) for 3 d. CD4<sup>+</sup> T lymphoblasts were selected using magnetic beads (Miltenyi) and seeded in a 96-well plate at 100,000 cells per well in RPMI1640 supplemented with 50% (vol/vol) human serum, 10% (vol/vol) FBS, IL-2 (100 U/mL), and cytokine-rich supernatant. Drugs other than PIs were added at this step and maintained throughout the culture. Standardized amounts of virus were added 16–18 h after the addition of drugs, and spinoculation was carried out at 1,200 × *g* at 30 °C for 2 h. After a 3-d incubation at 37 °C, cells were washed and fixed with 2% (vol/vol) formaldehyde. In all experiments, cells were considered positive if the level of green fluorescence was above the gate established with uninfected lymphoblasts from the same donor. Infectivity was quantified as the percentage of GFP<sup>+</sup> cells by FACS analysis (BD Bioscience).

**Analysis of Dose–Response Curves.** All data were obtained from at least three experiments with cells from different HIV-1–negative blood donors. *IC*<sub>50</sub> and slope values were calculated as described by Shen et al. (5). Briefly, the fraction of infection events unaffected by the drug (*f<sub>u</sub>*) was calculated as the percentage of GFP<sup>+</sup> cells in the presence of drug normalized by the percentage of GFP<sup>+</sup> cells without drug. *IC*<sub>50</sub> and *m* values were calculated from each dose–response curve by fitting data to the median effect model (Eqs. 1 and 2) through least-squares regression analysis. We calculated *IIP* with Eq. 3. We corrected for nonlinear *m* and unintegrated virus at high concentrations of PIs and integrase inhibitors, respectively, as described by Shen et al. (5). Selective advantage was estimated by multiplying the ratio *f<sub>u</sub>*(mutant)/*f<sub>u</sub>*(WT) at a given drug concentration by the replication capacity of mutant virus relative to WT in the absence of drug.

**Statistical Analyses.** Using Microsoft Office Excel 2007, we performed least-squares regression analysis and calculated mean values and SDs for *IC*<sub>50</sub> and *m* and *P* values for changes in *m* and *IC*<sub>50</sub>. Correlation coefficients for scatter plots relating fold change in *IC*<sub>50</sub> to fractional change in *IIP* at *C*<sub>max</sub> (Fig. 4) were also calculated using Microsoft Office Excel.

1. Zhang H, et al. (2004) Novel single-cell-level phenotypic assay for residual drug susceptibility and reduced replication capacity of drug-resistant human immunodeficiency virus type 1. *J Virol* 78:1718–1729.
2. Rhee SY, et al. (2003) Human immunodeficiency virus reverse transcriptase and protease sequence database. *Nucleic Acids Res* 31:298–303.
3. Shafer RW (2006) Rationale and uses of a public HIV drug-resistance database. *J Infect Dis* 194(Suppl 1):S51–S58.

4. Johnson VA, et al. (2009) Update of the drug resistance mutations in HIV-1: December 2009. *Top HIV Med* 17:138–145.
5. McMahon, MA et al. 2007. The HBV drug entecavir - effects on HIV-1 replication and resistance. *N Engl J Med* 356:2614–2621.
6. Shen L, et al. (2008) Dose-response curve slope sets class-specific limits on inhibitory potential of anti-HIV drugs. *Nat Med* 14:762–766.
